# Supplementary material for: Fine-Tuning of DADA2 Parameters for Multiregional Metabarcoding Analysis of 16S rRNA Genes from Activated Sludge and Comparison of Taxonomy Classification Power and Taxonomy Databases
Source: MDPI journal article supplement (doi:10.3390/ijms25063508), 2024-03-20
Supplement: s1 [file s1]

Table S1. DNA concentration (mg/μl) and date of collection of the seven samples tested.

| Lp | Sampling time | Concentration mg/μl |
|----|---------------|---------------------|
| 1. | June 2021     | 304                 |
| 2. | July 2021     | 300                 |
| 3  | October 2021  | 252                 |
| 4. | December 2021 | 251                 |
| 5. | February 2022 | 454                 |
| 6. | March 2022    | 325                 |
| 7. | May 2022      | 428                 |
